# Supplementary material for: End-of-life targeted degradation of DAF-2 insulin/IGF-1 receptor promotes longevity free from growth-related pathologies
Source: eLife journal article supplement (doi:10.7554/elife.71335), 2021-09-10

**A**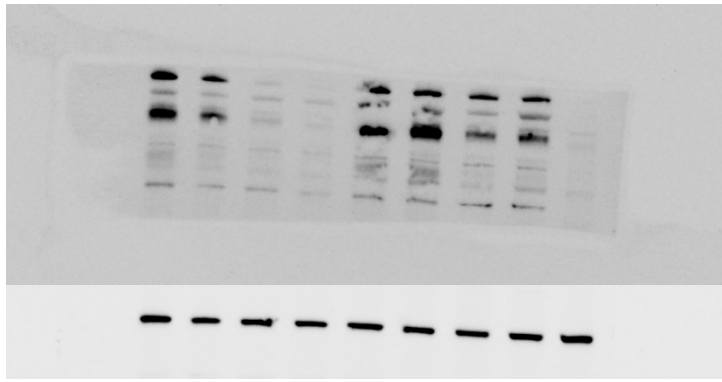**B**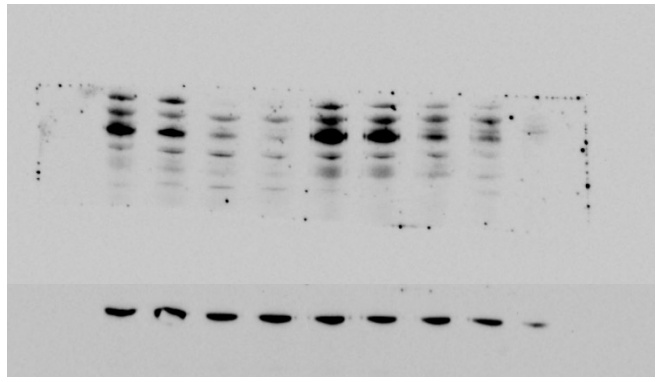**C**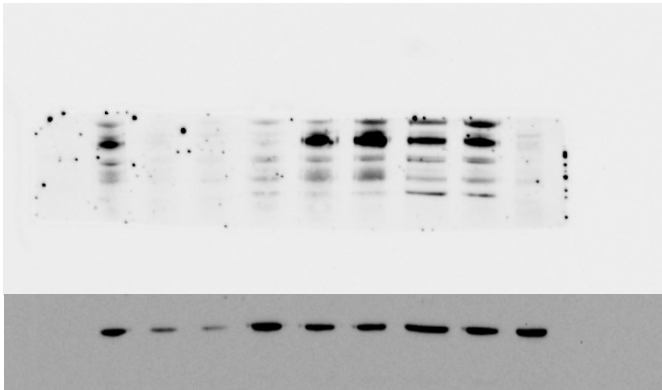**D**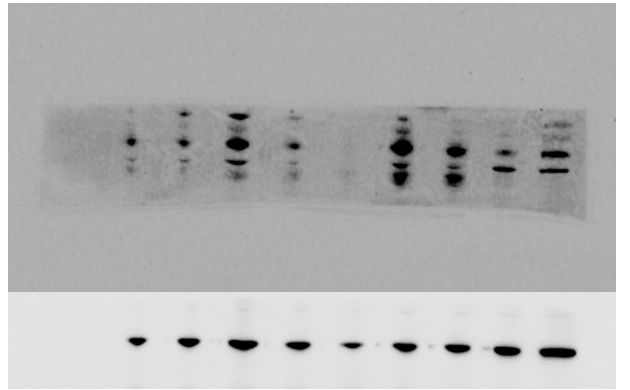**E**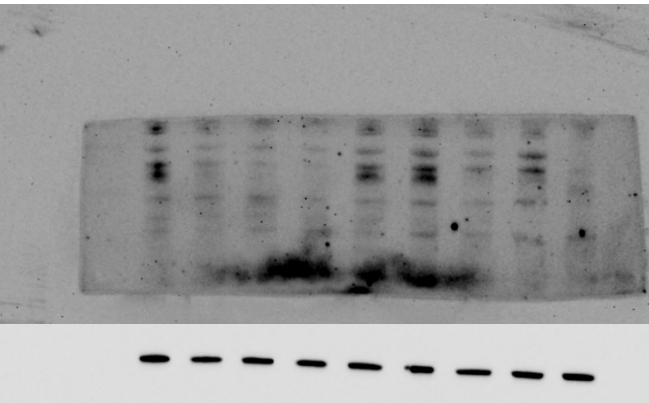

**F**

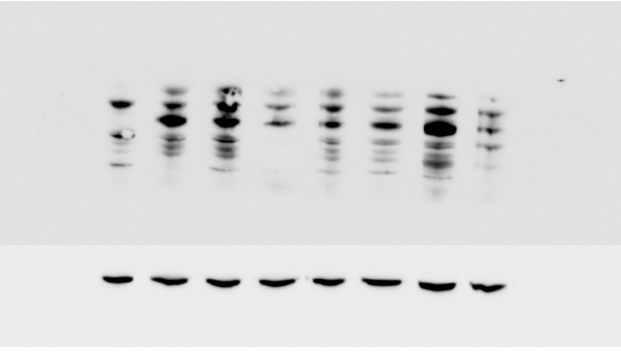

**G**

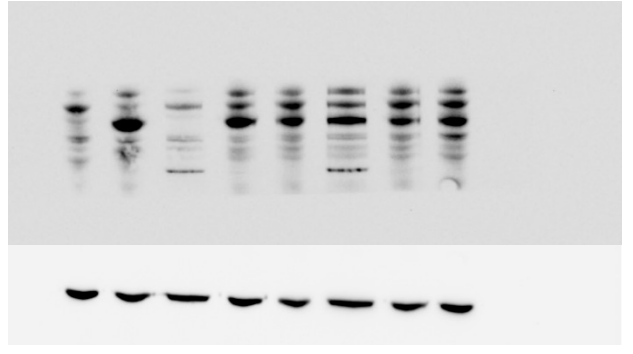

**I** 25.7

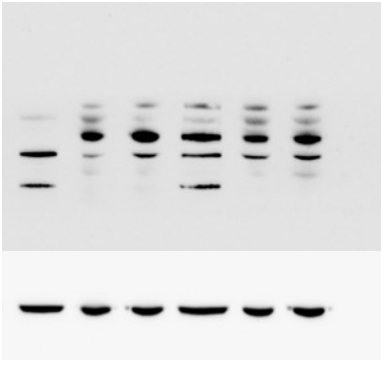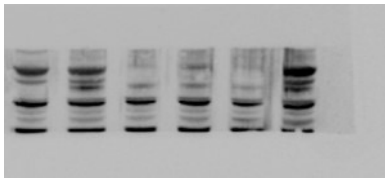

25.7

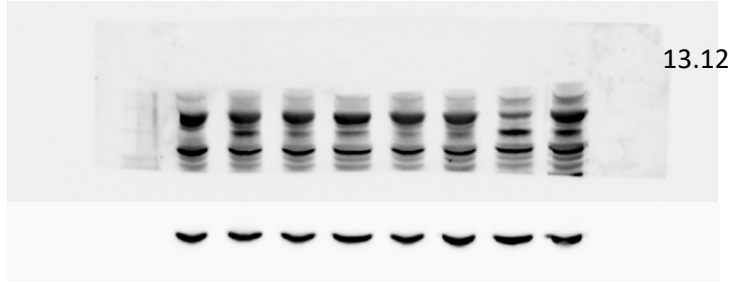

13.12

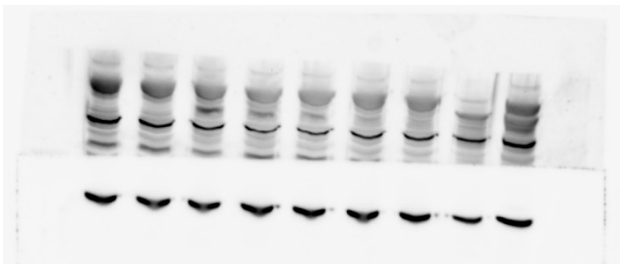

2.1

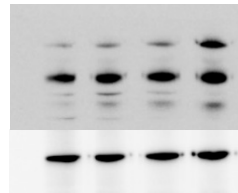

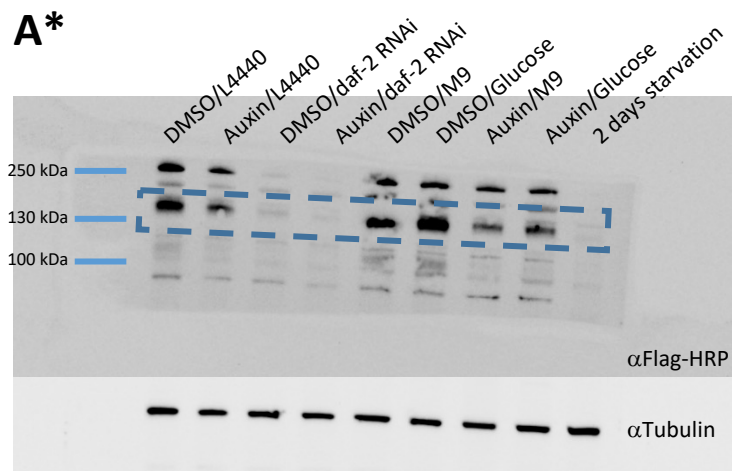

(This blot was used for fig. 1 C and 1F)

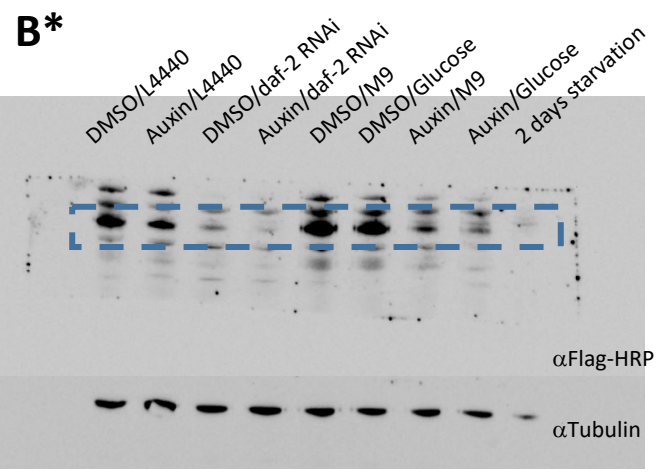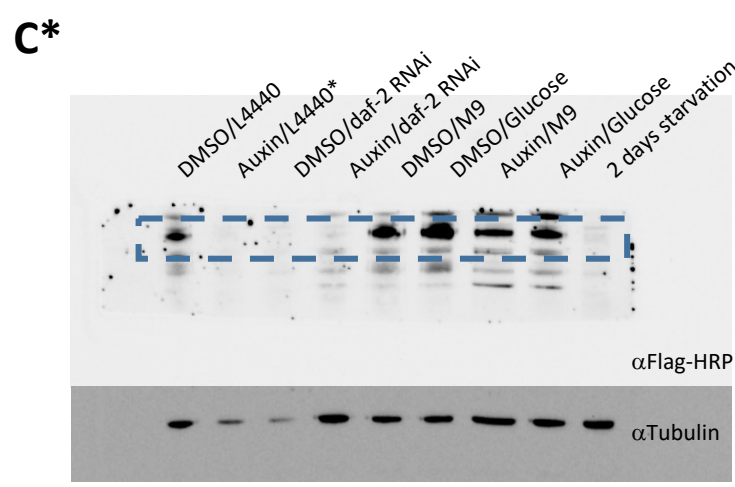

\*: sample was slightly starved when harvested and therefore excluded from analysis

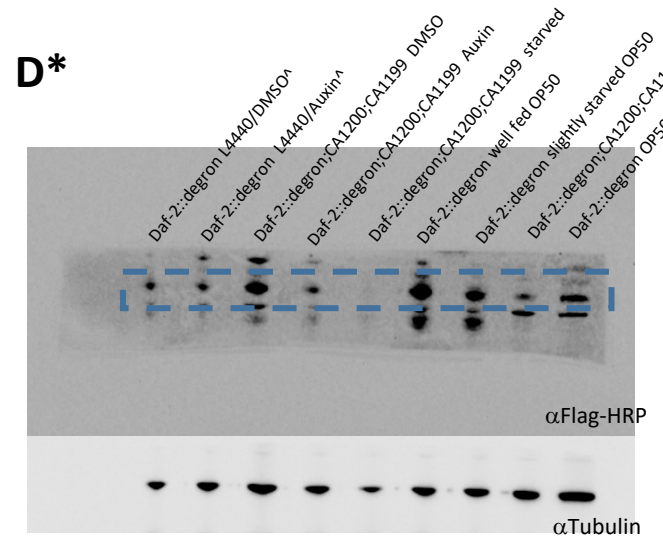

<sup>A</sup>: used for quantification in figure 1 I

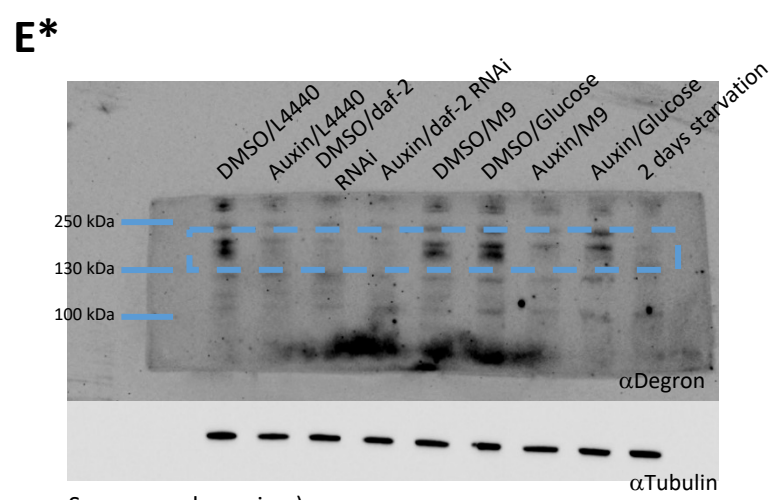

Same samples as in a)

**F\*** 13.12

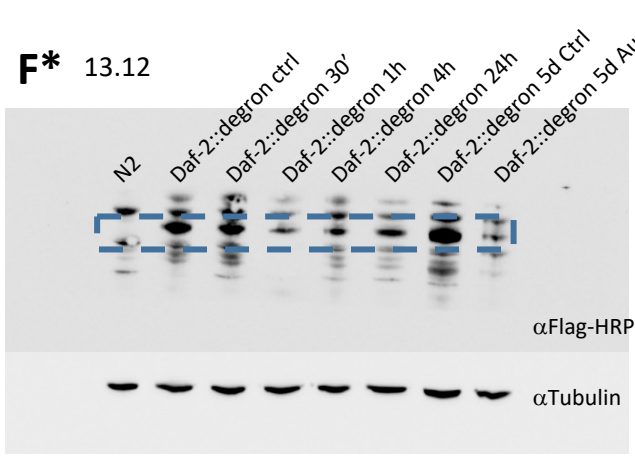

**G\*** 2.1

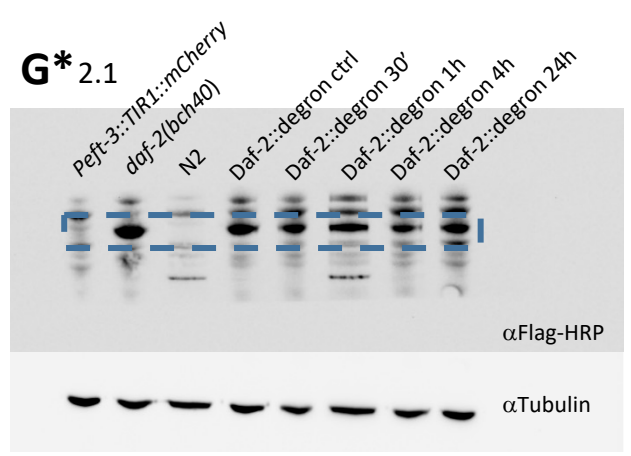

**I\*** 25.7

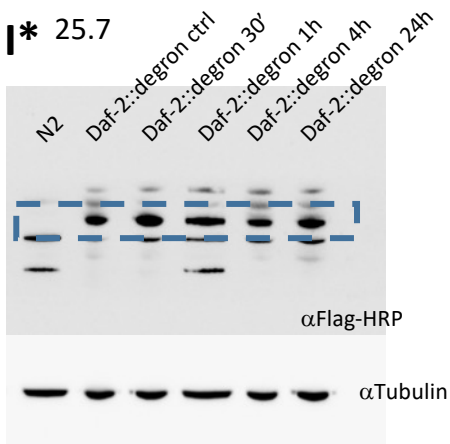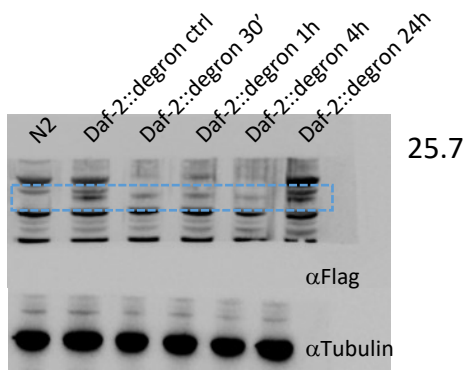

Samples boiled at 95°C

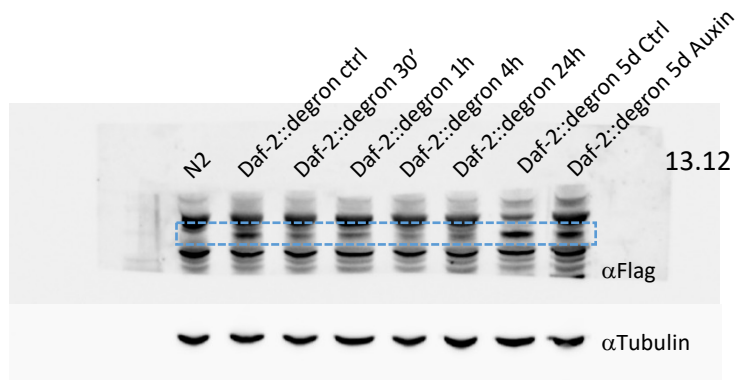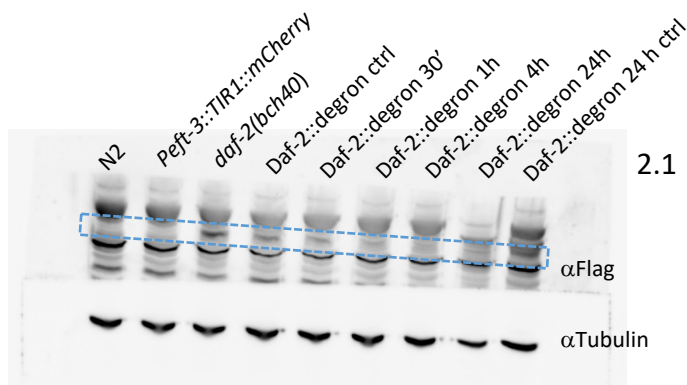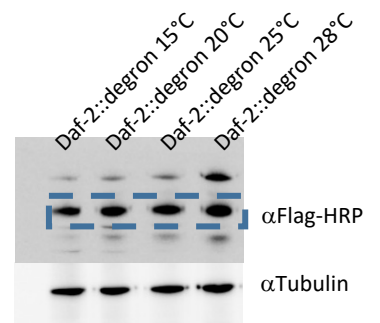

Supplement: supp [file elife-71335-supp-v1.zip]
