# Supplementary material for: End-of-life targeted degradation of DAF-2 insulin/IGF-1 receptor promotes longevity free from growth-related pathologies
Source: eLife. 2021 Sep 10;10:e71335. doi: 10.7554/eLife.71335 (PMC8492056; doi:10.7554/eLife.71335)
Supplement: Source data 1. — Each tab corresponds to a figure or multiple figure panels as indicated. Provided are the raw values for making the graphs, the quantifications, and statistics. [file elife-71335-supp4.xlsx]

## Sheet: Fig1dFig1f
Run1
	Tubulin			FLAG		Flag/Tubulin	Factor for normalisation	Relative normalized value (to daf-2::degron ctrl 1d)
L4440 DMSO d:d	10375.9			15503.4		1.49418	0.669264	1
L4440 Aux d:d	7667.81			7537.17		0.982962		0.657861
daf-2i DMSO d:d	9588.17			1326.06		0.138302		0.0925604
daf-2i Aux d:d	8500.52			333.021		0.0391766		0.0262194
DMSO d:d	10194.9			15038.5		1.4751	0.677921	1
DMSO + Glucose d:d	9097.35			20268.8		2.22799		1.5104
Auxin d:d	9201.35			7939.05		0.862813		0.584919
Auxin + Glucose d:d	10167.1			10367.9		1.01976		0.691316
starved d:d (for 2d)	11146.6			761.87		0.0683501		0.0463359
Run2
	FLAG			Tubulin		Flag/Tubulin	Factor for normalisation	Relative normalized value (to daf-2::degron ctrl 1d)
L4440 DMSO d:d	11365.5			10596.5		1.07257	0.932344	1
L4440 Aux d:d	8907.61			10959		0.812811		0.757819
daf-2i DMSO d:d	2511.03			10518.6		0.238723		0.222572
daf-2i Aux d:d	661.991			12046.2		0.0549541		0.0512362
DMSO d:d	14023.6			10599		1.32311	0.755795	1
DMSO + Glucose d:d	13557.1			9190.17		1.47518		1.11493
Auxin d:d	5205.61			8975.35		0.57999		0.438354
Auxin + Glucose d:d	3167.95			7426.28		0.426587		0.322412
starved d:d (for 2d)	892.77			2084.01		0.42839		0.323775
Run3
	FLAG			Tubulin		Flag/Tubulin	Factor for normalisation	Relative normalized value (to daf-2::degron ctrl 1d)
L4440 DMSO d:d	7572.39			6335.52		1.19523	0.836661	1
L4440 Aux d:d	49.536			2367.84		0.0209203		0.0175032
daf-2i DMSO d:d	66.364			1285.01		0.0516447		0.043209
daf-2i Aux d:d	295.607			9739.12		0.0303525		0.0253948
DMSO d:d	7062.85			7155.81		0.987009	1.01316	1
DMSO + Glucose d:d	12504.8			7513.64		1.66428		1.68619
Auxin d:d	4836.88			11736.7		0.412117		0.417542
Auxin + Glucose d:d	5361.18			9239.3		0.580258		0.587895
starved d:d (for 2d)	66.536			9281.17		0.00716892		0.00726327
All runs grouped		p-value against control	All runs grouped		p-value against control
L4440 DMSO	1		DMSO	1
L4440 DMSO	1		DMSO	1
L4440 DMSO	1		DMSO	1
L4440 Aux	0.650984	0.000839591	DMSO + Glucose	1.19373	0.0323917
L4440 Aux	0.757819		DMSO + Glucose	1.68619
L4440 Aux	0.657861		DMSO + Glucose	1.5104
daf-2i DMSO	0.043209	7.97544e-05	Auxin	0.568274	0.000862344
daf-2i DMSO	0.222572		Auxin	0.417542
daf-2i DMSO	0.0925604		Auxin	0.584919
daf-2i Aux	0.0253948	3.56493e-08	Auxin + Glucose	0.664068	0.000339882
daf-2i Aux	0.0512362		Auxin + Glucose	0.587895
daf-2i Aux	0.0262194		Auxin + Glucose	0.691316
			starved	0.0273373	1.08298e-07
			starved	0.00726327
			starved	0.0463359

## Sheet: Fig1j
Run1 (21.6.19)
	Tubulin			FLAG-HRP		Flag/Tubulin	Factor for normalisation	Relative normalized value (to daf-2::degron ctrl 1d)
N2	8205.76			n.d.
daf-2::degron ctrl 1d	9584.66			10801.5		1.12695	0.887349	1
daf-2::degron 30'	9709.25			7699.53		0.79301		0.703676
daf-2::degron 1h	9830.25			4613.59		0.469326		0.416456
daf-2::degron 4h	8709.3			5245.12		0.602244		0.534401
daf-2::degron 24h	10705.5			8695.9		0.812281		0.720776
daf-2::degron ctrl 5d	11658.7			16517.3		1.41674		1.25715
daf-2::degron auxin 5d	8779.71			3228.76		0.367753		0.326325
Run2 (25.6.19, first one)
	Tubulin			FLAG-HRP		Flag/Tubulin		Relative normalized value (to daf-2::degron ctrl 1d)
CA1200	9871.66			n.d.
IFM174	9135.66			n.d.
N2	10391.4			n.d.
daf-2::degron ctrl 1d	9362.66			10029.5		1.07123	0.933509	1
daf-2::degron 30'	7522.07			6869.39		0.91323		0.852509
daf-2::degron 1h	12336			11420.5		0.925787		0.864231
daf-2::degron 4h	8791.2			6347.02		0.721975		0.67397
daf-2::degron 24h	10058.7			7573.15		0.752893		0.702832
Run3 (2.7.19)
	Tubulin			FLAG-HRP		Flag/Tubulin		Relative normalized value (to daf-2::degron ctrl 1d)
N2	10492.4			n.d.
daf-2::degron 30'	8125.2			7215.15		0.887997		0.643938
daf-2::degron ctrl	8351.25			11516.4		1.37901	0.725159	1
daf-2::degron 1h	11777			12029.6		1.02145		0.740715
daf-2::degron 4h	7691.42			6994.95		0.909449		0.659495
daf-2::degron 24h	9289.2			9512.32		1.02402		0.742577
Statistics:
	Daf-2::degron ctrl	0.5 h treatment	1 h treatment	4 h treatment	24 h treatment
	1	0.643938	0.740715	0.67397	0.702832
	1	0.852509	0.864231	0.534401	0.720776
	1	0.703676	0.416456	0.659495	0.742577
p-value		0.00632536	0.0354873	0.00052126	8.66656e-06

## Sheet: SupFig1c+d
c
Run	Strain	Offspring after 2 hours of synchronous egg lay (10 animals, 20°C)
1	N2	110
1	daf-2::Degron	110
2	N2	95
2	daf-2::Degron	125
3	N2	120
3	daf-2::Degron	132
d
Run	Strain		Total	Not adult or sick	% Heallthy and normally growing
1	N2	N2	110	2	98.2143
1	daf-2::Degron	daf-2::Degron	110	3	98.2143
2	N2	N2	95	2	97.9381
2	daf-2::Degron	daf-2::Degron	125	2	98.4252
3	N2	N2	120	3	98.3607
3	daf-2::Degron	daf-2::Degron	132	4	98.5075

## Sheet: Fig2b+SupFig2b
Run 1
Nuclear DAF-16::GFP translocation after 1 h					Nuclear DAF-16::GFP translocation after 5 h
	None	Intermediate	High			None	Intermediate	High
1000 uM	0	0	74		1000 uM	0	0	68
100 uM	0	32	59		100 uM	0	1	102
50 uM	8	64	1		50 uM	0	81	16
10 uM	109	4	0		10 uM	90	9	0
1 uM	91	0	0		1 uM	92	0	0
DMSO	87	0	0		DMSO	58	0	0
Run 2
Nuclear DAF-16::GFP translocation after 1 h					Nuclear DAF-16::GFP translocation after 5 h
	None	Intermediate	High			None	Intermediate	High
1000 uM	0	0	36		1000 uM	0	0	36
100 uM	0	29	47		100 uM	0	0	37
50 uM	11	28	1		50 uM	0	38	0
10 uM	48	4	0		10 uM	40	8	0
1 uM	64	0	0		1 uM	47	0	0
DMSO	50	0	0		DMSO	48	0	0
Run 3
Nuclear DAF-16::GFP translocation after 1 h					Nuclear DAF-16::GFP translocation after 5 h
	None	Intermediate	High			None	Intermediate	High
1000 uM	0	2	29		1000 uM	0	0	33
100 uM	0	30	8		100 uM	0	5	29
50 uM	22	1	0		50 uM	7	19	0
10 uM	33	0	0		10 uM	28	0	0
1 uM	42	0	0		1 uM	39	0	0
DMSO	40	0	0		DMSO	38	0	0
Combined
Nuclear DAF-16::GFP translocation after 1 h					Nuclear DAF-16::GFP translocation after 5 h
	None	Intermediate	High	Total		None	Intermediate	High	Total
1000 uM	0	2	139	141	1000 uM	0	0	137	137
100 uM	0	91	114	205	100 uM	0	6	168	174
50 uM	41	93	2	136	50 uM	7	138	16	161
10 uM	190	8	0	198	10 uM	158	17	0	175
1 uM	197	0	0	197	1 uM	178	0	0	178
DMSO	177	0	0	177	DMSO	144	0	0	144		> The numbers in the combined tables were used for statistics and plotting
Negative Control (TJ356) after 1 h					Negative Control (TJ356) after 5 h
	None	Intermediate	High	Total		None	Intermediate	High	Total
1000 uM Trial 1	44	0	0		1000 uM Trial 1	45	0	0
1000 uM Trial 2	74	0	0	118	1000 uM Trial 2	72	0	0	117
DMSO Trial 1	43	0	0		DMSO Trial 1	40	0	0
DMSO Trial 2	51	0	0	94	DMSO Trial 2	54	0	0	94		> The numbers in total were used for statistics and plotting
p-values for 1 h					p-values for 5 h
None Intermediate High					None Intermediate High
1000 uM 0 2 139					1000 uM 0 0 137
DMSO 177 0 0					DMSO 144 0 0
> fisher.test(table1)					> fisher.test(table1)
Fisher's Exact Test for Count Data					Fisher's Exact Test for Count Data
data: table1					data: table1
p-value < 2.2e-16					p-value < 2.2e-16
alternative hypothesis: two.sided					alternative hypothesis: two.sided
None Intermediate High					None Intermediate High
100 uM 0 91 114					100 uM 0 6 168
DMSO 177 0 0					DMSO 144 0 0
> fisher.test(table1)					> fisher.test(table1)
Fisher's Exact Test for Count Data					Fisher's Exact Test for Count Data
data: table1					data: table1
p-value < 2.2e-16					p-value < 2.2e-16
alternative hypothesis: two.sided					alternative hypothesis: two.sided
None Intermediate High					None Intermediate High
50 uM 41 93 2					50 uM 7 138 16
DMSO 177 0 0					DMSO 144 0 0
> fisher.test(table1)					> fisher.test(table1)
Fisher's Exact Test for Count Data					Fisher's Exact Test for Count Data
data: table1					data: table1
p-value < 2.2e-16					p-value < 2.2e-16
alternative hypothesis: two.sided					alternative hypothesis: two.sided
None Intermediate High					None Intermediate High
10 uM 190 8 0					10 uM 158 17 0
DMSO 177 0 0					DMSO 144 0 0
> fisher.test(table1)					> fisher.test(table1)
Fisher's Exact Test for Count Data					Fisher's Exact Test for Count Data
data: table1					data: table1
p-value = 0.007905					p-value = 4.432e-05
alternative hypothesis: two.sided					alternative hypothesis: two.sided
None Intermediate High					None Intermediate High
1 uM 197 0 0					1 uM 178 0 0
DMSO 177 0 0					DMSO 144 0 0
> fisher.test(table1)					> fisher.test(table1)
Fisher's Exact Test for Count Data					Fisher's Exact Test for Count Data
data: table1					data: table1
p-value = 1					p-value = 1
alternative hypothesis: two.sided					alternative hypothesis: two.sided

## Sheet: Fig2c
Run 1				L4	For 24 h on plates with DMSO or 1 mM Auxin
sod-3::gfp;IFM174;CA1200	Yes	No
Auxin	60	0
DMSO	0	60
Run 2
sod-3::gfp;IFM174;CA1200	Yes	No
Auxin	40	0
DMSO	1	39
Run 3
sod-3::gfp;IFM174;CA1200	Yes	No
Auxin	75	1
DMSO	0	47
Run 4
sod-3::gfp;IFM174;CA1200	Yes	No
Auxin	64	0
DMSO	0	52
Neg. Control Run 1
sod-3::gfp	Yes	No
Auxin	0	61
DMSO	0	86
Neg. Control Run 2
sod-3::gfp	Yes	No
Auxin	0	79
DMSO	0	67
Combined
sod-3::gfp;IFM174;CA1200	Yes	No
Auxin	239	1
DMSO	1	198
sod-3::gfp	Yes	No
Auxin	0	140
DMSO	0	153

## Sheet: Fig2d
Run1					L4/YA	For 24 h on plates with DMSO or 1 mM Auxin
daf-2::degron;gst-4::gfp	High	Intermediate	Low/No GFP
Auxin	7	22	4
DMSO	0	0	40
Run2
daf-2::degron;gst-4::gfp	High	Intermediate	Low/No GFP
Auxin	7	5	6
DMSO	0	0	19
Run3
daf-2::degron;gst-4::gfp	High	Intermediate	Low/No GFP
Auxin	29	55	21
DMSO	0	4	77
gst-4::gfp	High	Intermediate	Low/No GFP
Auxin	0	0	46
DMSO	0	0	41
Run4
daf-2::degron;gst-4::gfp	High	Intermediate	Low/No GFP
Auxin	19	34	11
DMSO	0	2	109
gst-4::gfp	High	Intermediate	Low/No GFP
Auxin	0	4	65
DMSO	0	2	68
Combined
daf-2::degron;gst-4::gfp	High	Intermediate	Low/No GFP		total
Auxin	62	116	42		220
DMSO	0	6	245		251
gst-4::gfp	High	Intermediate	Low/No GFP		0
Auxin	0	4	111		115
DMSO	0	2	109		111
High Intermediate None
daf-2::degron;gst-4::gfp Auxin 62 116 42
daf-2::degron;gst-4::gfp DMSO 0 6 245
> fisher.test(table1)
Fisher's Exact Test for Count Data
data: table1
p-value < 2.2e-16
alternative hypothesis: two.sided
High Intermediate None
gst-4::gfp Auxin 0 4 111
gst-4::gfp DMSO 0 2 109
> fisher.test(table1)
Fisher's Exact Test for Count Data
data: table1
p-value = 0.6836
alternative hypothesis: two.sided

## Sheet: SupFig2d
	Beads	No Beads	% with beads
Auxin	3	29	9.375
Auxin	0	42	0
Auxin	0	30	0
DMSO	44	6	88
DMSO	42	11	79.2453
DMSO	47	4	92.1569
t.test:	7.14335e-05

## Sheet: SupFig3a+SupFig3b
Run 1		% Non-Dauer	at 20°C			at 25°C
	at 20°C	at 25°C	Total	Dauers	Non-Dauers	Total	Dauers	Non-Dauers
19h	0	0	193	193	0	216	216	0
20h	2.12766	0	94	92	2	215	215	0
21h	0.657895	0	304	302	2	289	289	0
22h	2.61194	1.12994	268	261	7	177	175	2
23h	6.30631	4.50704	222	208	14	355	339	16
24h	28.2609	4.53258	46	33	13	353	337	16
25h	38.0769	17.2	260	161	99	250	207	43
26h	71.3542	43.0769	192	55	137	260	148	112
Run 2		% Non-Dauer	at 20°C			at 25°C
	at 20°C	at 25°C	Total	Dauers	Non-Dauers	Total	Dauers	Non-Dauers
20h	0	0.552486	65	65	0	181	180	1
21h	0.625	2.14286	160	159	1	140	137	3
22h	9.41176	22.2222	85	77	8	135	105	30
23h	45.7711	50.8475	201	109	92	177	87	90
24h	91.1205	76.7584	473	42	431	327	76	251
25h	91.9255	99.4475	322	26	296	181	1	180
26h	97.852	98.9873	419	9	410	395	4	391
27h	98.8827	99.308	179	2	177	289	2	287
Run 3		% Non-Dauer	at 20°C			at 25°C
	at 20°C	at 25°C	Total	Dauers	Non-Dauers	Total	Dauers	Non-Dauers
20h	0	0	83	83	0	151	151	0
21h	0	0	71	71	0	250	250	0
22h	0.352113	0	284	283	1	179	179	0
23h	6.94444	1.2987	72	67	5	231	228	3
24h	48.8189	29.0909	127	65	62	165	117	48
25h	81.2207	41.4773	213	40	173	352	206	146
Run 4		% Non-Dauer	at 20°C			at 25°C
	at 20°C	at 25°C	Total	Dauers	Non-Dauers	Total	Dauers	Non-Dauers
19h	0	0	127	127	0	254	254	0
20h	0	0	109	109	0	299	299	0
21h	2.32558	1.83486	172	168	4	218	214	4
22h	37.6812	10.7981	69	43	26	213	190	23
23h	40.9091	32.7759	110	65	45	299	201	98
24h	78.9474	74.2537	152	32	120	268	69	199
25h	91.1439	81.7967	271	24	247	423	77	346
26h	98.0296	93.3014	203	4	199	209	14	195
Run 5		% Non-Dauer	at 20°C			at 25°C
	at 20°C	at 25°C	Total	Dauers	Non-Dauers	Total	Dauers	Non-Dauers
19h	0	0	94	94	0	85	85	0
20h	0	0	71	71	0	241	241	0
21h	0.854701	0	117	116	1	150	150	0
22h		0.568182				176	175	1
23h	2.29008	2.34742	131	128	3	213	208	5
24h	37	34.2105	100	63	37	152	100	52
25h	53.7415	53.1579	147	68	79	190	89	101
26h	77.7778	88.9952	234	52	182	209	23	186
27h	84.7162	88.9952	229	35	194	209	23	186
Run 6		% Non-Dauer	at 20°C			at 25°C
	at 20°C	at 25°C	Total	Dauers	Non-Dauers	Total	Dauers	Non-Dauers
19h	0	0	112	112	0	147	147	0
20h	0	0	156	156	0	75	75	0
21h	0.568182	1.08696	176	175	1	92	91	1
22h	1.07527	0	93	92	1	183	183	0
23h	2.77778	9.7561	36	35	1	82	74	8
24h	24.7423	14.2077	97	73	24	183	157	26
25h	31.9728	50.237	147	100	47	211	105	106
26h	73.7089	87.0968	426	112	314	310	40	270
27h	85.9712	88.5196	278	39	239	331	38	293
Run 7		% Non-Dauer	at 20°C			at 25°C
	at 20°C	at 25°C	Total	Dauers	Non-Dauers	Total	Dauers	Non-Dauers
19h	0	0	209	209	0	274	274	0
20h	0	0	178	178	0	232	232	0
21h	0	0	115	115	0	174	174	0
22h	3.07692	1.15607	65	63	2	173	171	2
23h			0
24h	79.3566	48.8281	373	77	296	512	262	250
25h	94.3396	85.0602	371	21	350	415	62	353
26h	95.2681	94.3137	317	15	302	510	29	481
27h	97.9661	96.6767	295	6	289	331	11	320
Total		% Non-Dauer	at 20°C			at 25°C
	at 20°C	at 25°C	Total	Dauers	Non-Dauers	Total	Dauers	Non-Dauers
19h	100	100	735	735	0	976	976	0
20h	99.7354	99.9283	756	754	2	1394	1393	1
21h	99.1928	99.3907	1115	1106	9	1313	1305	8
22h	94.7917	95.3074	864	819	45	1236	1178	58
23h	79.2746	83.7878	772	612	160	1357	1137	220
24h	28.1433	57.0408	1368	385	983	1960	1118	842
25h	25.4188	36.9436	1731	440	1291	2022	747	1275
26h	13.7912	13.6292	1791	247	1544	1893	258	1635
27h	8.35882	6.37931	981	82	899	1160	74	1086

## Sheet: SupFig3c
Round 1
Number of germ cells	Number observed						Number of germ cells	Number observed	Frequency in %
4	6						4	17	5.88235
6	4						6	24	8.3045
8	18						8	63	21.7993		%
10	4						10	69	23.8754	4 to 10 cells	59.8616
12	14						12	67	23.1834
14	11						14	27	9.34256
16	8						16	21	7.26644
18	1						18	1	0.346021	12 to 18 cells	40.1384
Round 2
Number of germ cells	Number observed
4	3						Sum	289
6	3
8	19
10	18
12	18
14	1
16	4
Round 3
Number of germ cells	Number observed
4	8
6	14
8	14
10	10
12	6
14	2
16	1
Round 4
Number of germ cells	Number observed
4	0
6	1
8	7
10	16
12	13
14	6
16	2
Round 5
Number of germ cells	Number observed
4	0
6	2
8	5
10	21
12	16
14	7
16	6

## Sheet: SupFig3e
		eggs hatched
	DAF-2::degron	1 mM Auxin	10 mM Auxin		t-test
Run1		105	24		0.0215596
Run2		207	28
Run3		80	51
Run4		130	62
		eggs hatched
	N2	1 mM Auxin	10 mM Auxin		t-test
Run1		146	87		0.0176566
Run2		133	91

[truncated: 20 more sheets: Fig3a, Fig3b, Fig 3c, Fig 3d, Fig 3e, Fig4ef+g, Fig 4a, Fig 4d, Fig 4e, Fig 4f, SupFig 4c, SupFig 4d, SupFig 4e, SupFig 5b, SupFig 5c, Fig5a, Fig5b_20200831_DAF2degronLS, Fig5c_20200911_DAF2degronLS, Fig5d_20200827_DAF2degronLS, 20200908_DAF2degronLS]
