# Supplementary material for: End-of-life targeted degradation of DAF-2 insulin/IGF-1 receptor promotes longevity free from growth-related pathologies
Source: eLife journal article supplement (doi:10.7554/elife.71335), 2021-09-10

Auxin treatment:  
L4 to 1d adult

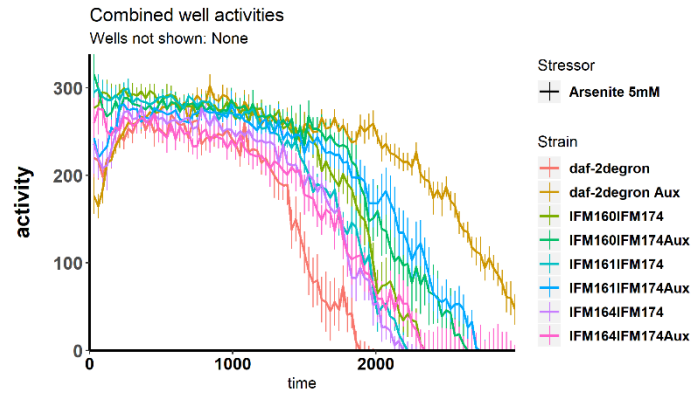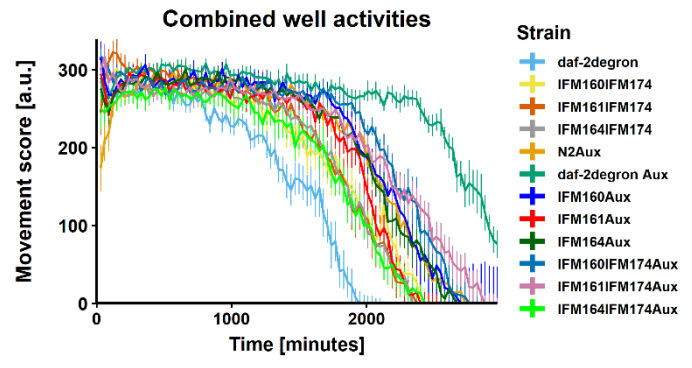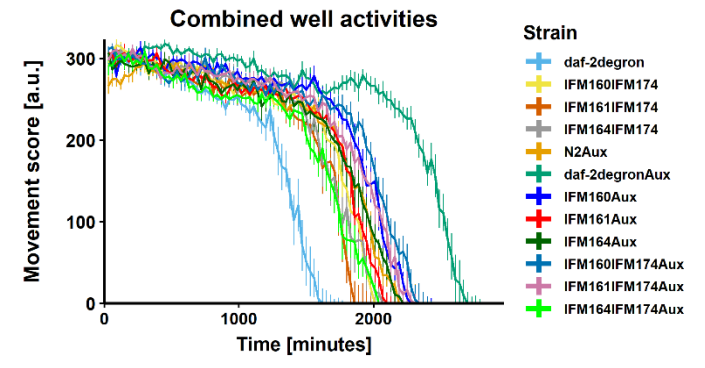

Auxin treatment:  
L1 to 1d adult (except  
DAF-2::degron)

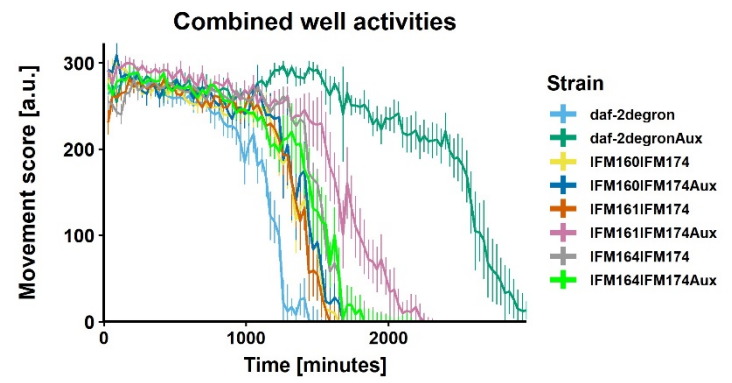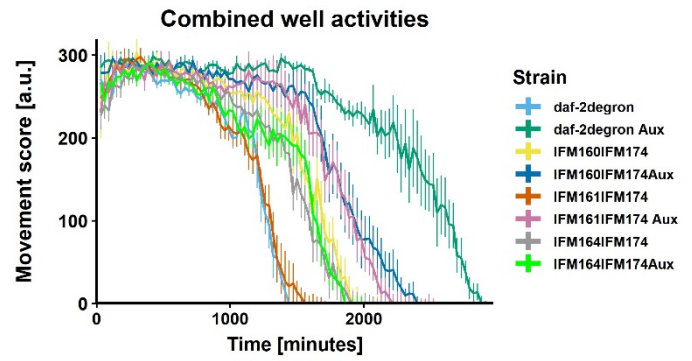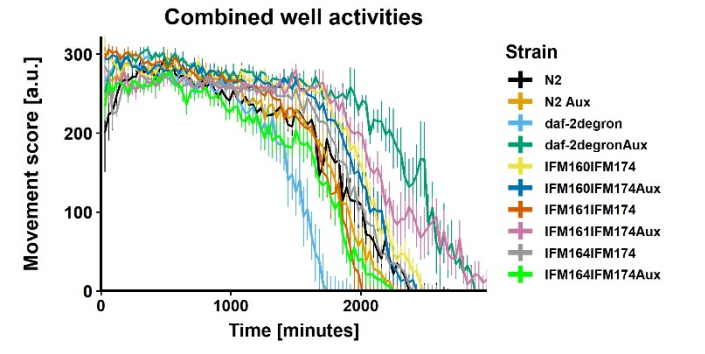

Auxin treatment:  
L4 to 5d adult

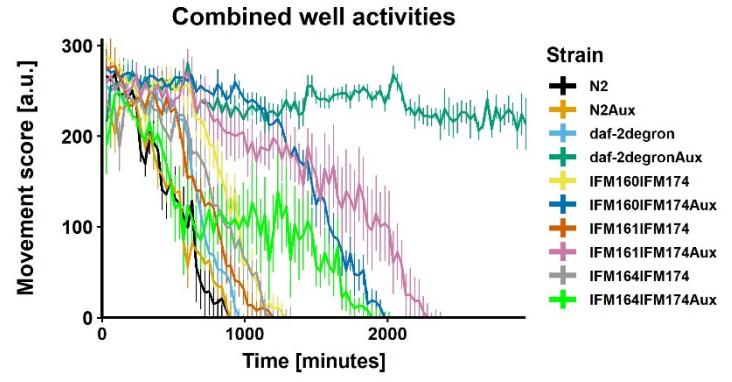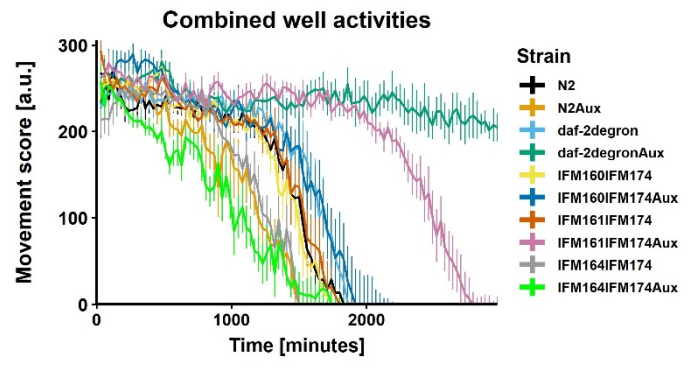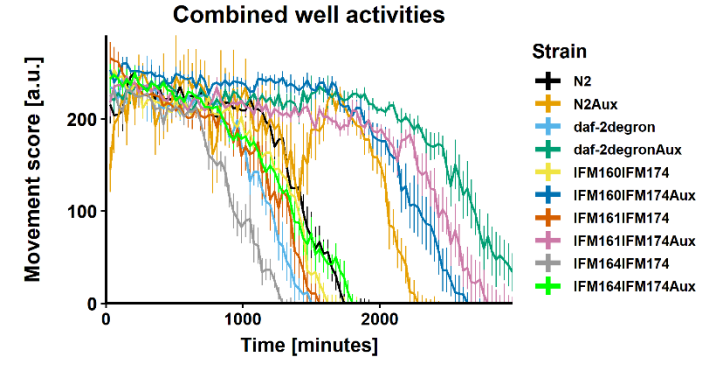

Supplement: supp [file elife-71335-supp-v1.zip]
