# Supplementary material for: End-of-life targeted degradation of DAF-2 insulin/IGF-1 receptor promotes longevity free from growth-related pathologies
Source: eLife. 2021 Sep 10;10:e71335. doi: 10.7554/eLife.71335 (PMC8492056; doi:10.7554/eLife.71335)
Supplement: Supplementary file 2. — Our observed phenotypes loss or reduction of function with AID DAF-2::degron compared to literature reported phenotypes using daf-2 mutants or daf-2(RNAi). Studies are cited by using PMIDs. [file elife-71335-supp2.xlsx]

## Sheet: DAF2degronPhenotypes
			Development				Aging	Resilience	Dauer-associated phenotypes
Strain	Explanation of Strain	Treatment	Dauer Formation	Block of Dauer Entry	Embryonic lethaltiy	L1 arrest	Longevity	Stress Resistance	egg retention	germline remodeling	Reduced brood size	Smaller body size	Immobility	Reference (PMID)
wild type (N2)		DMSO or control	No	Not Daf-c	No	No	No	No	No	No	No	No	No	This study and/or 9725835, 12399591, 14961122, 25517099, 28423308, 30905669
wild type (N2)		Auxin	No	Not Daf-c	No	No	No (very little)	No	No	No	No	No	No	This study
wild type (N2)		daf-2(RNAi)	No	Not Daf-c	No	No	Yes	Yes	No	No	No	No	No	9725835, 12399591, 14961122, 25517099, 28423308, 30905669
RAF2181	daf-2::degron; somatic TIR1	DMSO	No	Not Daf-c	No	No	No	No	No	No	No	No	No	This study
RAF2181	daf-2::degron; somatic TIR1	Auxin	Yes, at any temperature	Not Daf-c	No	No	Yes	Yes	Yes	Yes	Yes	Yes	No	This study
LSD2120	daf-2::degron; somatic TIR1; germline TIR1	DMSO	No	Not Daf-c	No	No	n.d.	n.d.	n.d.	n.d.	n.d.	n.d.	n.d.	This study
LSD2120	daf-2::degron; somatic TIR1; germline TIR1	Auxin	Yes, at any temperature	Not Daf-c	No	No	n.d.	n.d.	n.d.	n.d.	n.d.	n.d.	n.d.	This study
RAF5032	daf-2::degron; muscular TIR1	DMSO	No	Not Daf-c	No	No	No	No	No	No	n.d.	No	n.d.	This study
RAF5032	daf-2::degron; muscular TIR1	Auxin	No	Not Daf-c	No	No	No	No	No	No	n.d.	No	n.d.	This study
RAF5032	daf-2::degron; muscular TIR1	daf-2(RNAi) plus Auxin	No	Not Daf-c	No	No	No	No	No	No	n.d.	No	n.d.	This study
RAF5033	daf-2::degron; intestinal TIR1	DMSO	No	Not Daf-c	No	No	No	No	No	No	n.d.	No	n.d.	This study
RAF5033	daf-2::degron; intestinal TIR1	Auxin	No	Not Daf-c	No	No	Partial	Partial	No	No	n.d.	No	n.d.	This study
RAF5033	daf-2::degron; muscular TIR1	daf-2(RNAi) plus Auxin	No	Not Daf-c	No	No	No	No	No	No	n.d.	No	n.d.	This study
RAF5034	daf-2::degron; neuronal TIR1	DMSO	No	Not Daf-c	No	No	No	No	No	No	n.d.	No	n.d.	This study
RAF5034	daf-2::degron; neuronal TIR1	Auxin	No	Not Daf-c	No	No	Partial	No	Yes	Yes	n.d.	No	n.d.	This study
RAF5034	daf-2::degron; muscular TIR1	daf-2(RNAi) plus Auxin	No	Not Daf-c	No	No	No	No	No	No	n.d.	No	n.d.	This study
N/A	daf-2::degron; intestinal TIR1/neuronal TIR1	DMSO	No	Not Daf-c	No	No	n.d.	n.d.	n.d.	n.d.	n.d.	n.d.	n.d.	This study
N/A	daf-2::degron; intestinal TIR1/neuronal TIR1	Auxin	No	Not Daf-c	No	No	n.d.	n.d.	n.d.	n.d.	n.d.	n.d.	n.d.	This study
N/A	daf-2::degron; intestinal TIR1/neuronal TIR1	daf-2(RNAi) plus Auxin	No	Not Daf-c	No	No	n.d.	n.d.	n.d.	n.d.	n.d.	n.d.	n.d.	This study
LSD2116	daf-2::degron; daf-16::degron; somatic TIR1	DMSO	No	No	No	No	n.d.	n.d.	n.d.	n.d.	n.d.	n.d.	n.d.	This study
LSD2116	daf-2::degron; daf-16::degron; somatic TIR1	Auxin	No	Yes	No	No	n.d.	n.d.	n.d.	n.d.	n.d.	n.d.	n.d.	This study and * 25517099
CB1370	daf-2(e1370)	DMSO or control	Yes, at 25°C	No	Yes*°, at 25°C	Yes*°, at 25°C	Yes	Yes	Yes	Yes	Yes*	Yes*	Yes°, at > 20°C	This study and *°9725835, *°25517099, °28423308, °30905669
CB1370	daf-2(e1370)	Auxin	Yes, at 25°C	No	Yes, at 25°C	Yes, at 25°C	Yes	Yes	Yes	Yes	n.d.	n.d.	n.d.	This study
LSD2149	daf-2(e1370); daf-16::degron; somatic TIR1	DMSO	Yes, at 25°C	No	No	No	n.d.	n.d.	n.d.	n.d.	n.d.	n.d.	n.d.	This study
LSD2149	daf-2(e1370); daf-16::degron; somatic TIR1	Auxin	No	Yes	No	No	n.d.	n.d.	n.d.	n.d.	n.d.	n.d.	n.d.	This study
LSD2150	daf-2(e1370); daf-16::degron; neuronal TIR1	DMSO	Yes, at 25°C	No	No	No	n.d.	n.d.	No	No	n.d.	n.d.	n.d.	This study
LSD2150	daf-2(e1370); daf-16::degron; neuronal TIR1	Auxin	Yes, at 25°C	No	No	No	n.d.	n.d.	No	No	n.d.	n.d.	n.d.	This study
LSD2155	daf-2(e1370); daf-16::degron; intestinal TIR1	DMSO	Yes, at 25°C	No	No	No	n.d.	n.d.	n.d.	n.d.	n.d.	n.d.	n.d.	This study
LSD2155	daf-2(e1370); daf-16::degron; intestinal TIR1	Auxin	Yes, at 25°C	No	No	No	n.d.	n.d.	n.d.	n.d.	n.d.	n.d.	n.d.	This study
References (PMID)
9725835	Two pleiotropic classes of daf-2 mutation affect larval arrest, adult behavior, reproduction and longevity in Caenorhabditis elegans. Gems D, Sutton AJ, Sundermeyer ML, Albert PS, King KV, Edgley ML, Larsen PL, Riddle DL. Genetics. 1998 Sep;150(1):129-55.
12399591	Timing requirements for insulin/IGF-1 signaling in C. elegans. Dillin A, Crawford DK, Kenyon C. Science. 2002 Oct 25;298(5594):830-4.
14961122	A conserved siRNA-degrading RNase negatively regulates RNA interference in C. elegans. Kennedy S, Wang D, Ruvkun G. Nature. 2004 Feb 12;427(6975):645-9.
25517099	Dauer-independent insulin/IGF-1-signalling implicates collagen remodelling in longevity. Ewald CY, Landis JN, Porter Abate J, Murphy CT, Blackwell TK. Nature. 2015 Mar 5;519(7541):97-101. doi: 10.1038/nature14021.
28423308	How a Mutation that Slows Aging Can Also Disproportionately Extend End-of-Life Decrepitude. Podshivalova K, Kerr RA, Kenyon C. Cell Rep. 2017 Apr 18;19(3):441-450. doi: 10.1016/j.celrep.2017.03.062.
30905669	Dietary Restriction Extends Lifespan through Metabolic Regulation of Innate Immunity. Wu Z, Isik M, Moroz N, Steinbaugh MJ, Zhang P, Blackwell TK. Cell Metab. 2019 May 7;29(5):1192-1205.e8. doi: 10.1016/j.cmet.2019.02.013.
