# Supplementary material for: End-of-life targeted degradation of DAF-2 insulin/IGF-1 receptor promotes longevity free from growth-related pathologies
Source: eLife. 2021 Sep 10;10:e71335. doi: 10.7554/eLife.71335 (PMC8492056; doi:10.7554/eLife.71335)
Supplement: Supplementary file 3. — Detailed Caenorhabditis elegans strain list with detailed genotype information. Sequencing results of RNAi clones used in this study. Primer sequences and sequencing results verifying genotypes or proper CRISPR editing. [file elife-71335-supp3.xlsx]

## Sheet: Table S3
Strain name	Genotype	Comments
N2	wild type
CA1199	ieSi38 [sun-1p::TIR1::mRuby::sun-1 3'UTR + Cbr-unc-119(+)] IV.
CA1200	ieSi57 [eft-3p::TIR1::mRuby::unc-54 3'UTR + Cbr-unc-119(+)] II.
IFM174	ttTi5605; daf-2(bch40[degron-3xFLAG-STOP-SL2-SV40-degron-wrmScarlet-egl-13NLS]) III; unc-119(ed3) III.
RAF2181 (DAF-2::degron)	ieSi57 II; daf-2(bch40) III.	daf-2::degron
DR1572	daf-2(e1368) III.
CB1370	daf-2(e1370) III.
TJ356	zIs356 [daf-16p::daf-16a/b::GFP + rol-6(su1006)] IV.
RAF5036	ieSi57 II; daf-2(bch40) III; zIs356 IV.	daf-16::gfp in daf-2::degron
CL2166	dvIs19 [(pAF15)gst-4p::GFP::NLS] III.
RAF5087	ieSi57 II; dvIs19 III; daf-2(bch-40) III.	gst-4p::gfp in daf-2::degron
CF1553	muIs84 [(pAD76) sod-3p::GFP + rol-6(su1006)].
RAF5035	muIs84; ieSi57 II; daf-2(bch40) III.	sod-3p::gfp in daf-2::degron
IFM160	bchSi59[Pmyo-3::TIR1::mRuby::tbb-2] II; unc-119(ed3) III.
RAF5032	bchSi59[Pmyo-3::TIR1::mRuby::tbb-2] II; daf-2(bch-40) unc-119(ed3) III.	body wall-TIR1 in daf-2::degron
IFM161	bchSi60[Pvha-6::TIR1::mRuby::tbb-2] II; unc-119(ed3) III.
RAF5033	bchSi60[Pvha-6::TIR1::mRuby::tbb-2] II; daf-2(bch-40) unc-119(ed3) III.	Intestinal TIR1 in daf-2::degron
IFM164	bchSi64[Prab-3::TIR1::mRuby::tbb-2] II; unc-119(ed3) III.
RAF5034	bchSi64[Prab-3::TIR1::mRuby::tbb-2] II; daf-2(bch-40) unc-119(ed3) III.	Neuronal TIR1 in daf-2::degron
OH14125	daf-16(ot853[daf-16::linker::mNG::3xFlag::AID]) I.
LSD2116	daf-16(ot853) I; ieSi57 II; daf-2(bch40) III.	daf-16::degron in daf-2::degron
LSD2120	ieSi57 II; daf-2(bch40) III; ieSi38 IV.	germline-TIR1 in daf-2::degron
LD1036	daf-2(e1370) III; him-8(e1489) X.
LSD2149	daf-16(ot853) I; ieSi57 II; daf-2(e1370) III.	daf-16::degron and TIR1 in daf-2(e1370). Obtained by using LD1036 males.
LSD2150	daf-16(ot853) I; bchSi64 III; daf-2(e1370) III.	daf-16::degron and neuronal TIR1 in daf-2(e1370). Obtained by using LD1036 males.
LSD2155	daf-16(ot853) I; bchSi60 III; daf-2(e1370) III.	daf-16::degron and intestinal TIR1 in daf-2(e1370). Obtained by using LD1036 males.
Primers	Sequence
RV80_TIR1mRubyFw	TTCTGCCGTCAAATGACCAAC
RV81_TIR1mRubyRv	TTAACTCCACGAACTTGAGCG
RV88_oxTi179 fw	AGACAAAAGAACGGCTTTTGC
RV89_oxTi179 rv	AATGCTTCGGCTAAGTCGGT
RV94_daf-2WTnewfw	AACAGCCGTGACATTTTCAAC
RV95_daf-2WTnewrv	AGCCAATATTTCAGGGCTCTA
RV96_daf2degronDSfw	ACGTGGAATAGAGAGCTCACT
RV97_daf2degronDSrv	GGCTCTTGTCTTAGGACTCGT
RV98_daf2degronDSseq	ACTCAGTTTTGTCGGATTCGC
RV99_daf2degronUSrv	CTTGTAGATGAGGGTTCCGTC
RV100_daf2degronseq	CGAGGATAATGAGCATCATCC
RV101_CA1199fw	CAAATTACAATTCCGCACAGGC
RV102_CA1199rv	GGACTTGAGGTTTGGGCAAC
RV123_e1370fw	CTGAACCTCGACGTTCTCAAC
RV124_e1370rv	CCGCACAGATTTGTGATGGTA
RV125_e1370seq	CGAGGTGAGTATCTCCAGCAC
M13 fw	GTAAAACGACGGCCAGT
L4440 fw (for Sequencing DAF-2)	GTTTTCCCAGTCACGACGTT
Sequenced RNAi Clones	Sequence
daf-2	GTATACGACTCACTATAGGGCGAATTGGGTACCGGGCCCCCCCTCGAGGTCGACGGTATCGATAAGCTTGATATCACAAGTTTGTACAAAAAAGCAGGCTGCAAAAAAGTGAAAGCTCTATCTGACTTTATGCAATTGAATCCCGAATATTGTGTGGACAATAAGTACAATGCAGACGATTGGGAGCTACGGCAGGATGATGTTGTGCTCGGACAACAGTGTGGAGAGGGATCATTCGGAAAAGTGTACCTAGGAACTGGAAATAATGTTGTTTCTCTGATGGGTGATCGTTTCGGACCGTGTGCTATTAAGATTAATGTAGATGATCCAGCGTCGACTGAGAATCTCAACTATCTCATGGAAGCTAATATTATGAAGAACTTTAAGACTAACTTTATC…
Sequenced C. elegans Strains	Sequence
DAF-2::degron insert with RV98_daf2degronDSseq	CCTTGTAGAGCTCGTCCATTCCTCCGGTGGAGTGACGTCCCTCGGAACGCTCGTATTGCTCGACGACGGTGTAGTCCTCGTTGTGGGAGGTGATGTCGAGCTTACGGTCGACGTTGTAGGCTCCTGGCATTTGGACTGGCTTCTTGGCCTTGTAGGTGGTCTTGAAGTCGGCGAGGTAACGTCCTCCGTCCTTGAGACGGAGGGCCATCTTGATGTCTCCCTTGAGGACTCCGTCCTCTGGGTAGAGACGCTCGGTGGAGGCCTCCCATCCCATGGTCTTCTTTTGCATGACTGGTCCGTCTGGTGGGAAGTTGGTTCCACGGAGCTTGACCTGAAAATTTAAATCAGATTAGTTAATAACTTCGTATAGCATACATTATACGAAGTTATCTTTGAGCC…
DAF-2::degron insert with RV100_daf2degronseq	CATACCGGAAGAACGTGATGGTTTCCTGCCAAAAATCAAGCGGNGGCCCGGAGGCGGCGGCNTTCGTGAAGGACTATAANGACGATGATGATAAGGACTATAAGGACGACGACGACNAGGATTACAAGGATGATGACGACAAGTAAGCTGTCTCATCCTACTTTCACCTAGTTAACTGNTTGTCTTAAAATCTATGCTTCTCTTTAGTATCTAAAATTTTCCTAGAAGCTTACAAGTATATAAATGGTCTCTTCTCAATAAAGGTTGTATATTTATTCATCTTATTGAATCTGCCATTTCCTCGTTTTT
N2 with RV125_e1370seq	ATTCGGGCTTCTTGATAACCTTCCGGGCCATTCCAATATAATTCAACACCTCATCATTACTCAAACCAATATATGGCTGAGCACCGAGTGTAACCATTTCATAGAGAACAACTCCGAAGCTCCAAACATCAGATTTCGAGTCAAACTTTCCGTCTTTCAACGACTCGGGTGACATCCATCGAACAGGCATCATACGCTTGCCCGATGGCTTATAATAGTCATGATAGAATAGATCACGAGCCATTCCGAAATCTCCAATCTTGACAGTCTCATCCCGATTTATCATGCAATTACGTGCGGCGAGATCTCGATGGCAAAACTTGAGCGACTCCAGGTACGCCATACCATCACA
LD1036 with RV125_e1370seq	ATTCGGGCTTCTTGATAACCTTCCGGGCCATTCCAATATAATTCAACACCTCATCATTACTCAAACCAATATATGACTGAGCACCGAGTGTAACCATTTCATAGAGAACAACTCCGAAGCTCCAAACATCAGATTTCGAGTCAAACTTTCCGTCTTTCAACGACTCGGGTGACATCCATCGAACAGGCATCATACGCTTGCCCGATGGCTTATAATAGTCATGATAGAATAGATCACGAGCCATTCCGAAATCTCCAATCTTGACAGTCTCATCCCGATTTATCATGCAATTACGTGCGGCGAGATCTCGATGGCAAAACTTGAGCGACTCCAGGTACGCCATACCATCACATNNN
